# Supplementary material
Source: publisher figshare collection journal article supplement (https://frontiersin.figshare.com/ndownloader/files/25429895)
Supplement: Supplementary file 1 [file 25429895]

# Supplementary Figure S1

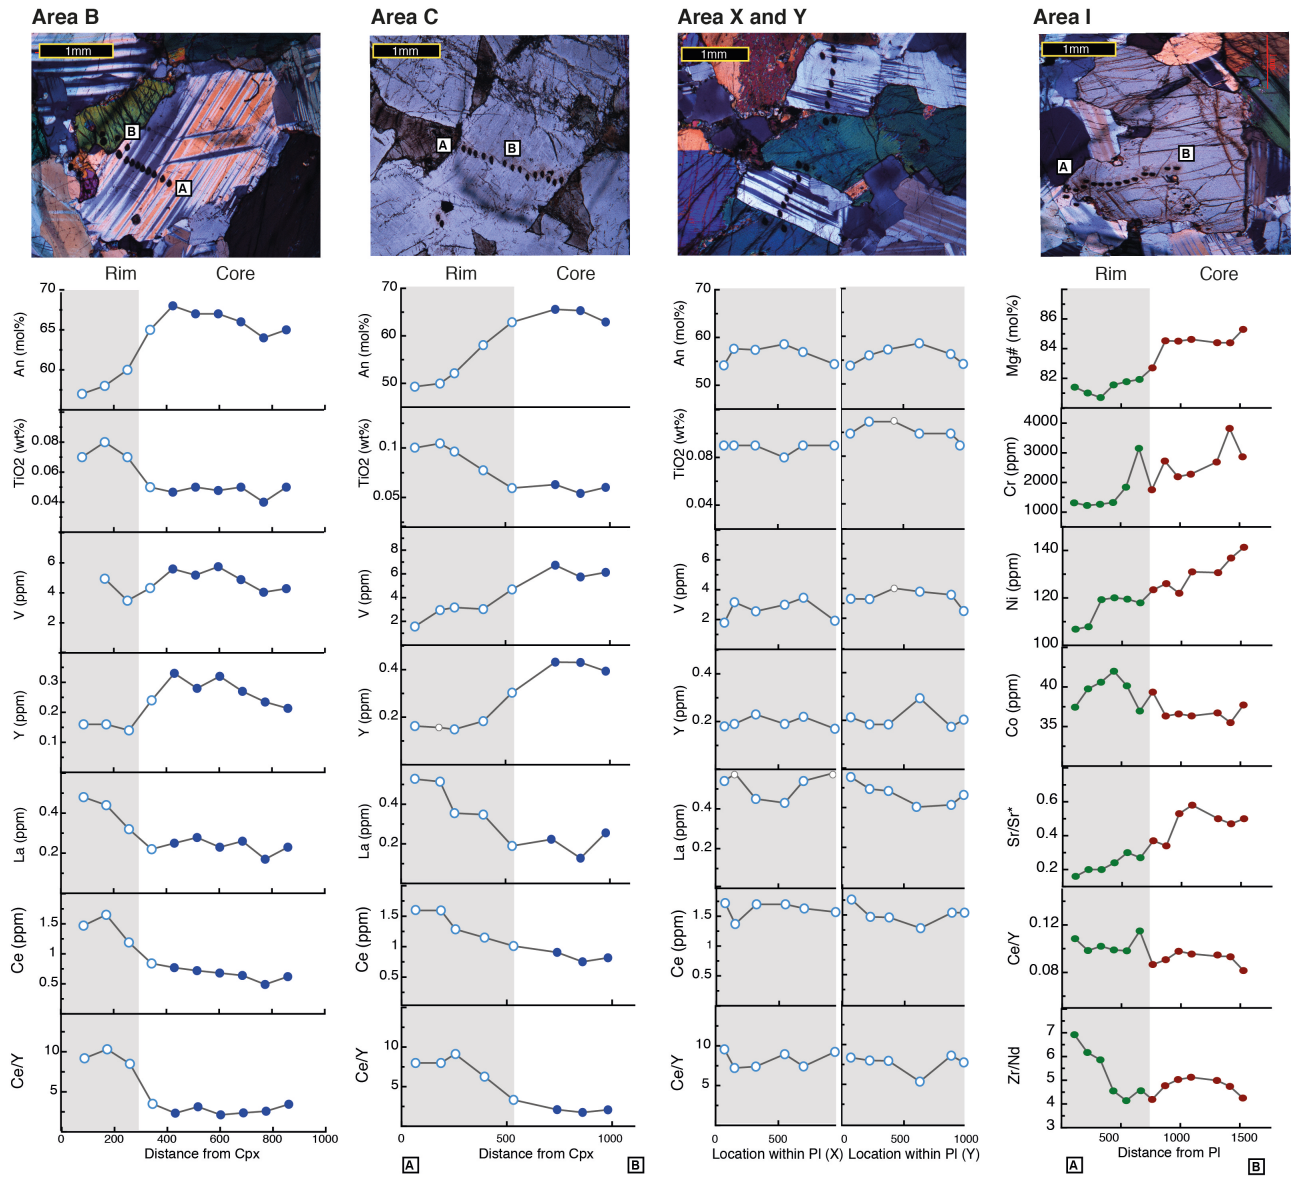

**Figure S1.** Plagioclase and clinopyroxene geochemical profiles of all grains selected (point B, C, X, Y and I). Plagioclase rim and clinopyroxene rim are defined on the chemical zoning and underlined by a grey background. Photomicrographs shows the locations of each point analyses.

## Supplementary Figure S2

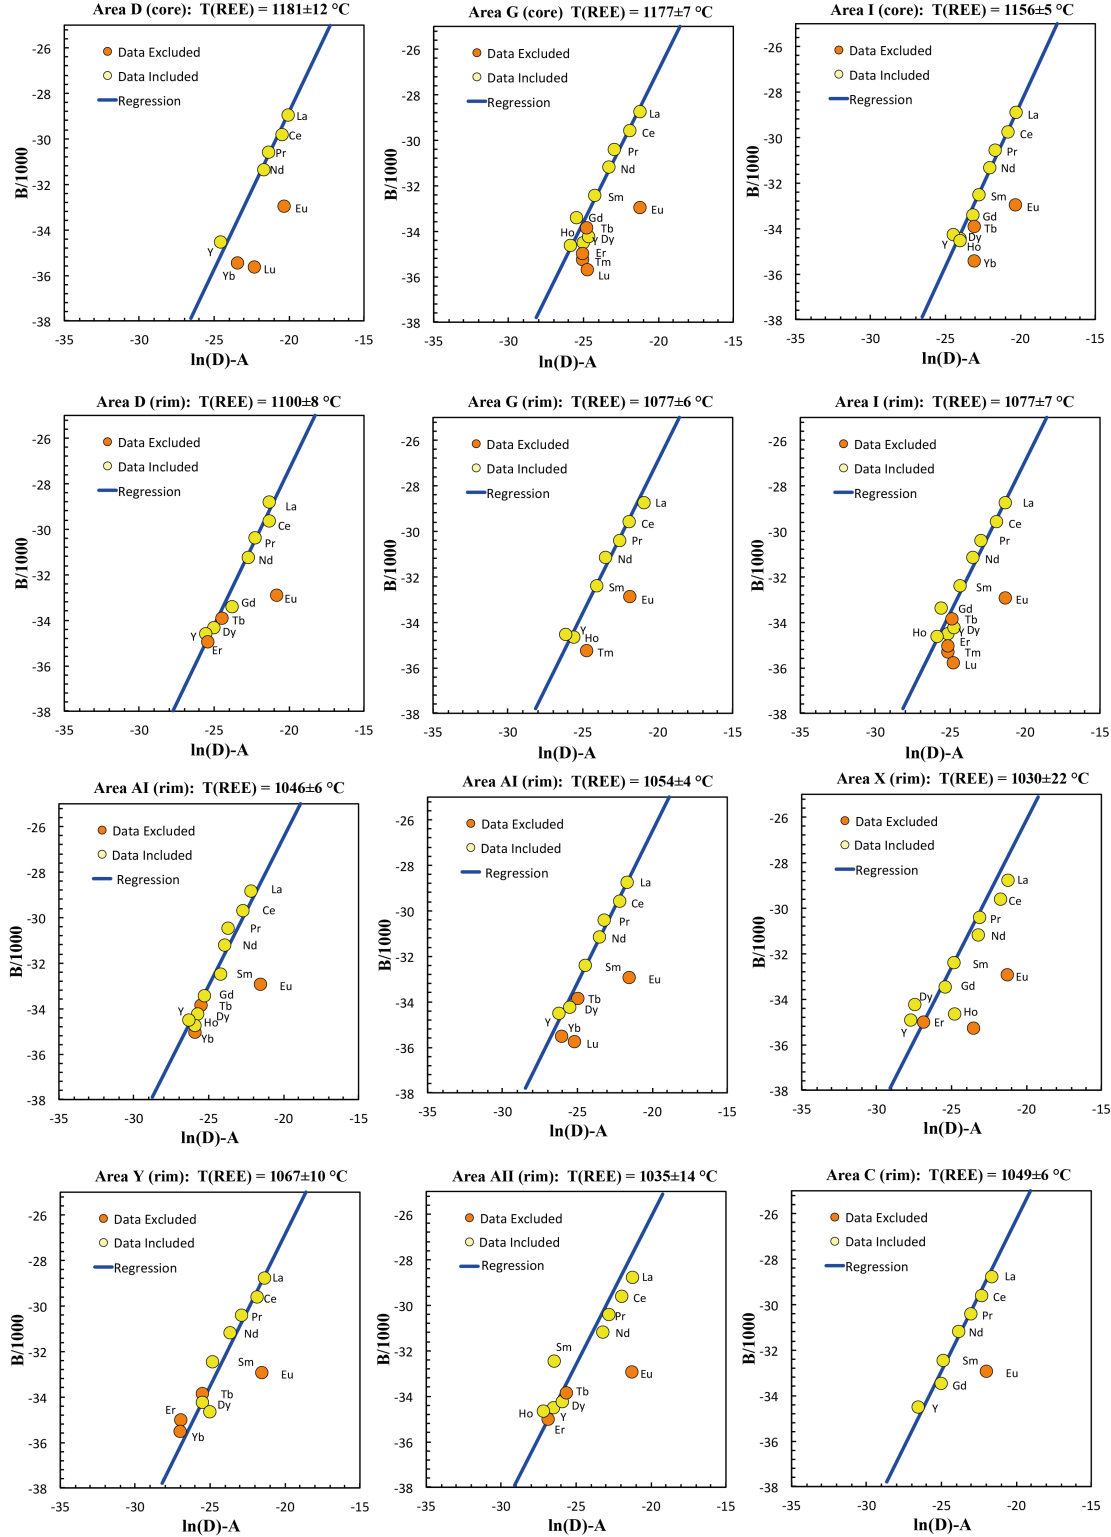

**Figure S1.**  $\ln(D)-A$  versus  $B/1000$  diagrams for selected clinopyroxene-plagioclase couples in different areas of the thin section (see Fig.3), and relative equilibration temperatures calculated using the Cpx-Pl thermometer of Sun and Liang (2017). Eu, Tb, Er, Yb and Lu were excluded due to uncertainties in quantifications in plagioclase

### Supplementary Figure S3

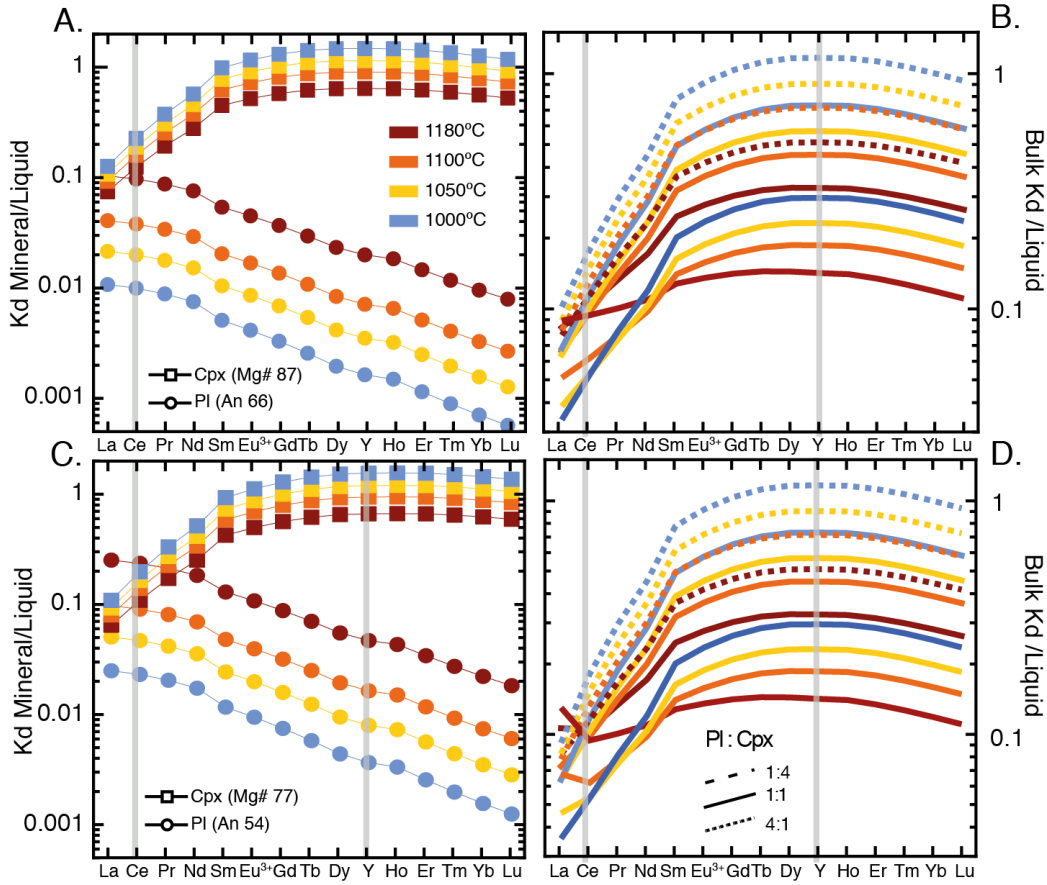

**Figure S3.** Effect of temperature and composition on REE-Y partitioning between clinopyroxene (Cpx) and plagioclase (Pl) and basaltic melts computed here on basis of Sun et al. (2017). A and C, variations in Kd mineral/liquid at temperature ranging from 1180°C and 1000°C for composition of Cpx- and Pl-I (A) and Cpx- and Pl-II (C). B and D, variations in bulk Kd at the same temperature and compositions of (A) and (B) and considering different Pl + Cpx assemblages. Note the different extent of variations in bulk Kd for Ce and Y, which may partly explain the more/less incompatible element fractionations observed in the recrystallised assemblage (see text).
